# Supplementary material for: Comprehensive multi-omics analysis reveals a combination of lncRNAs that synergistically regulate glycolysis and immunotherapeutic effects in renal clear cell carcinoma
Source: publisher site journal article supplement (doi:10.18632/aging.206069), 2024-08-19
Supplement: Supplementary file [file aging-v16i16-206069-supplementary-material-SD1.pdf]

**SUPPLEMENTARY FIGURES**

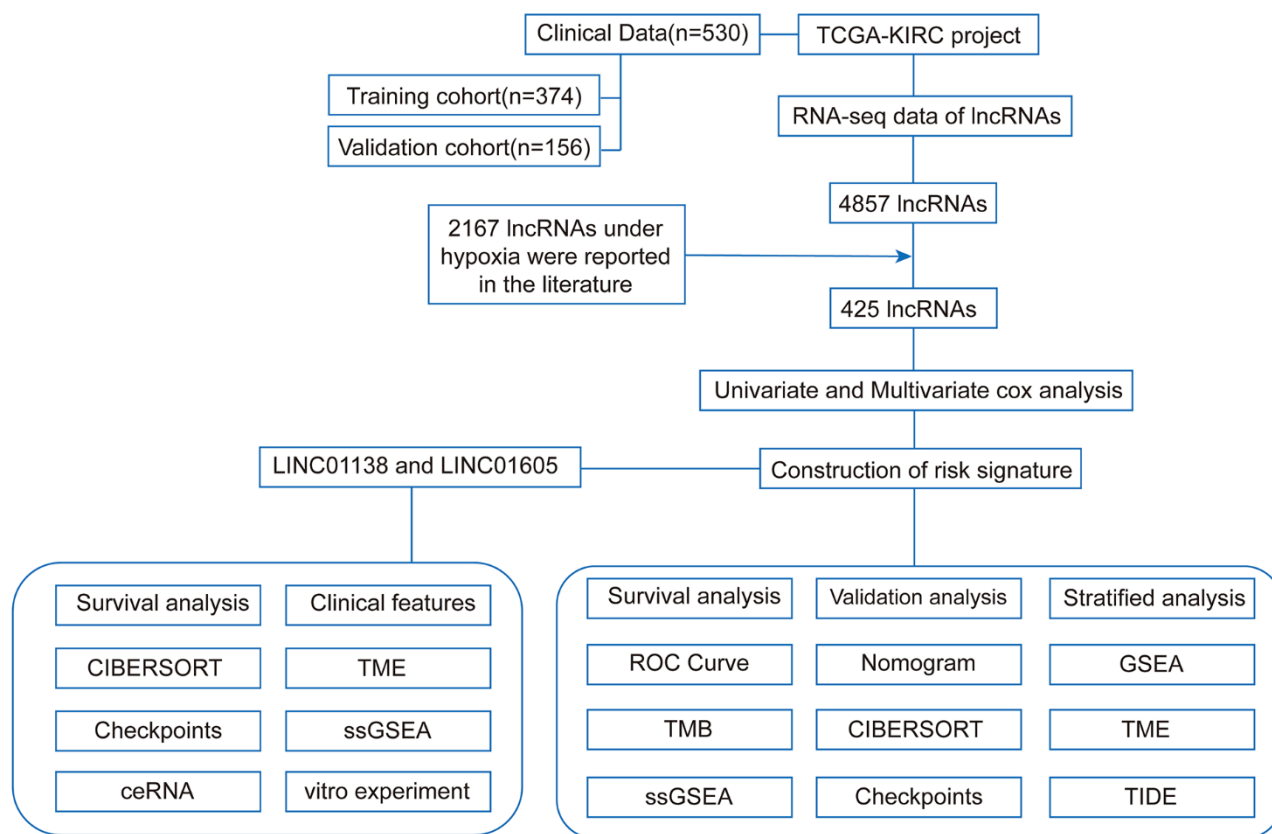

**Supplementary Figure 1. The technology roadmap for this study.**

**A**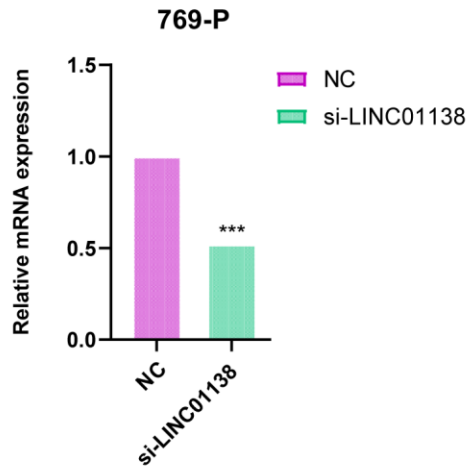**B**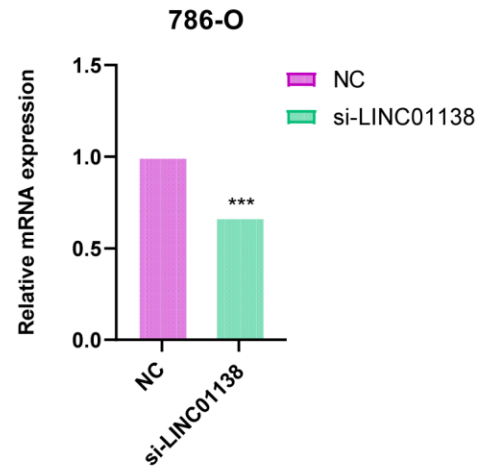**C**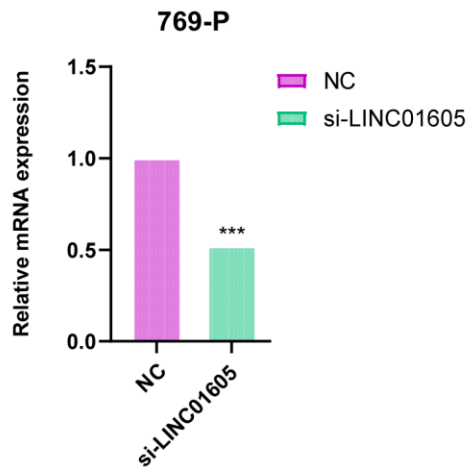**D**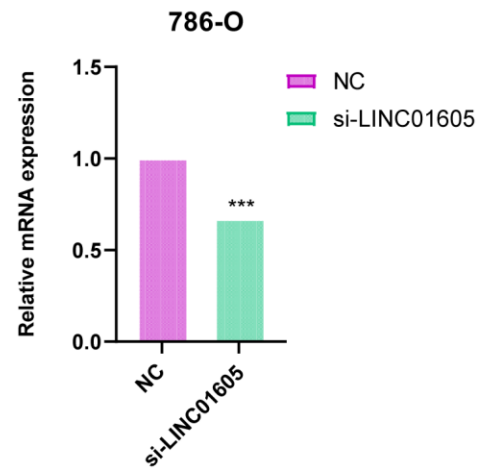

**Supplementary Figure 2.** (A–D) QPCR verified the mRNA expression level of LINC01138 and LINC01605 in 769-P and 786-O cells after transfection with siRNA.
